# Supplementary material for: Transcriptional factor regulation network and competitive endogenous RNA (ceRNA) network determining response of esophageal squamous cell carcinomas to neoadjuvant chemoradiotherapy
Source: PubMed Central journal article supplement (PMC6442670; doi:10.7717/peerj.6668), 2019-03-29

A

## hub gene

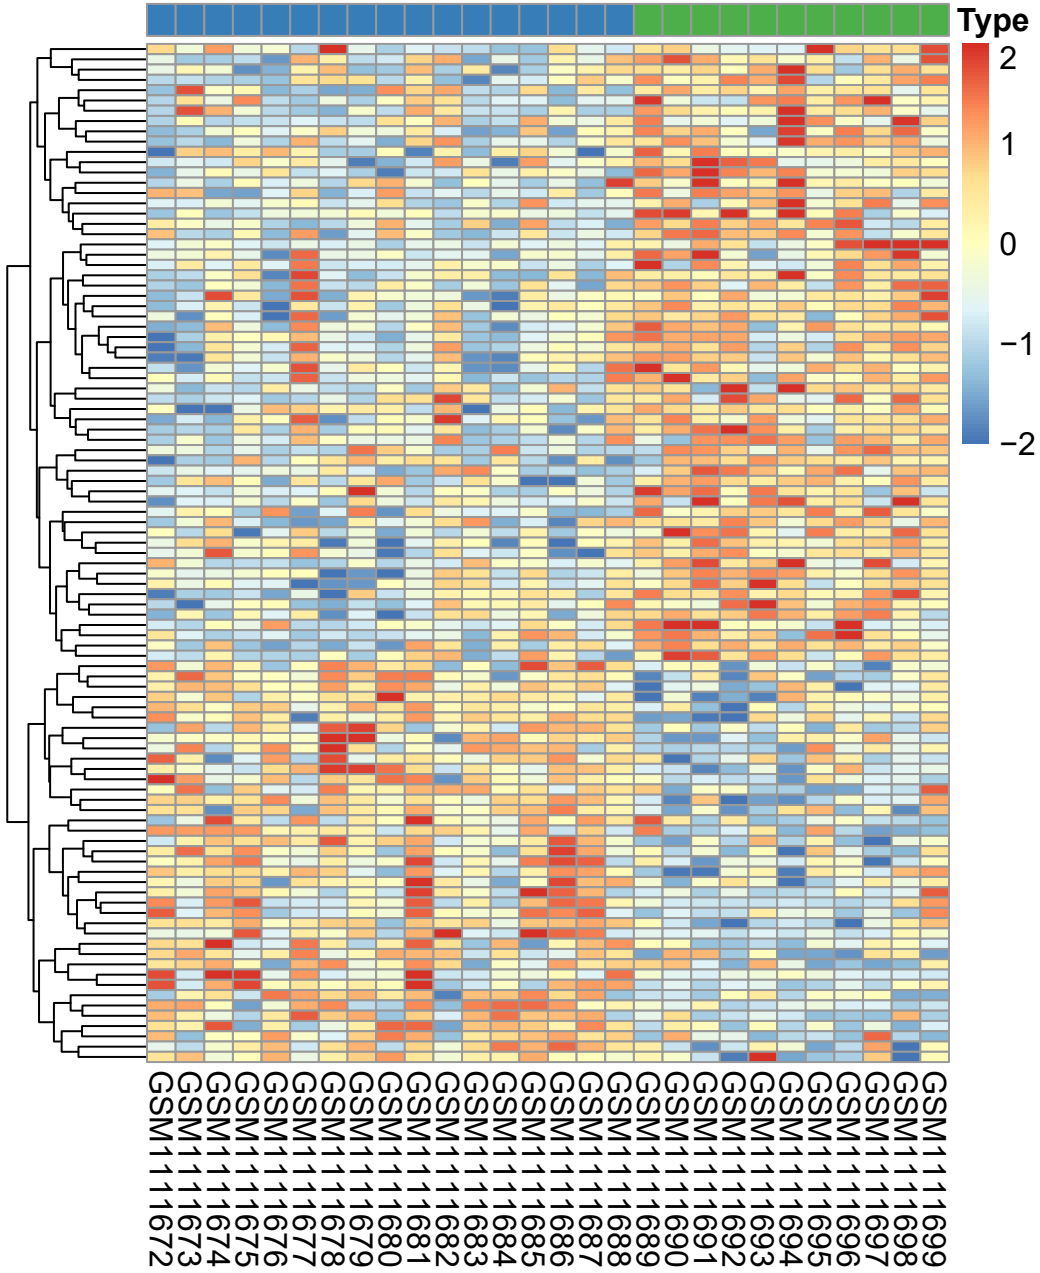

B

## hub miRNA

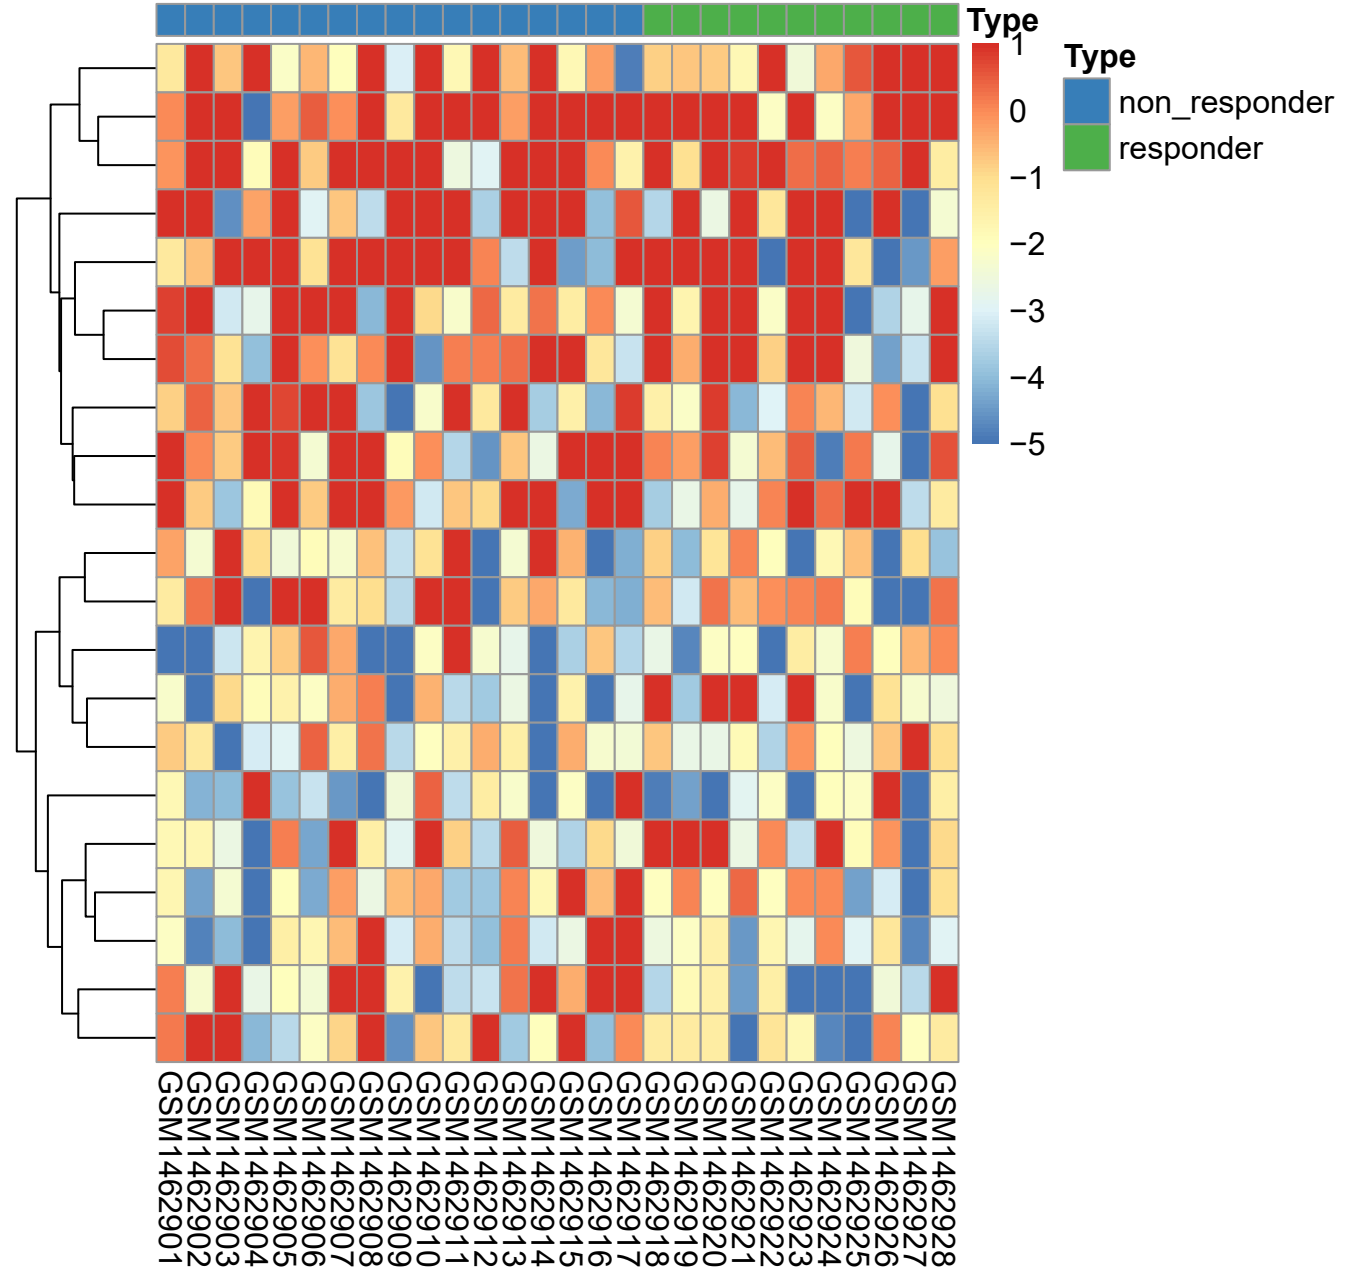

Supplement: peerj-07-6668-s004.pdf [file peerj-07-6668-s004.pdf]
